# Supplementary material
Source: Springer Nature journal article supplement (https://www.springermedizin.de/resource/supplementary/12887_2009_324_MOESM5_ESM.pdf/9474842)

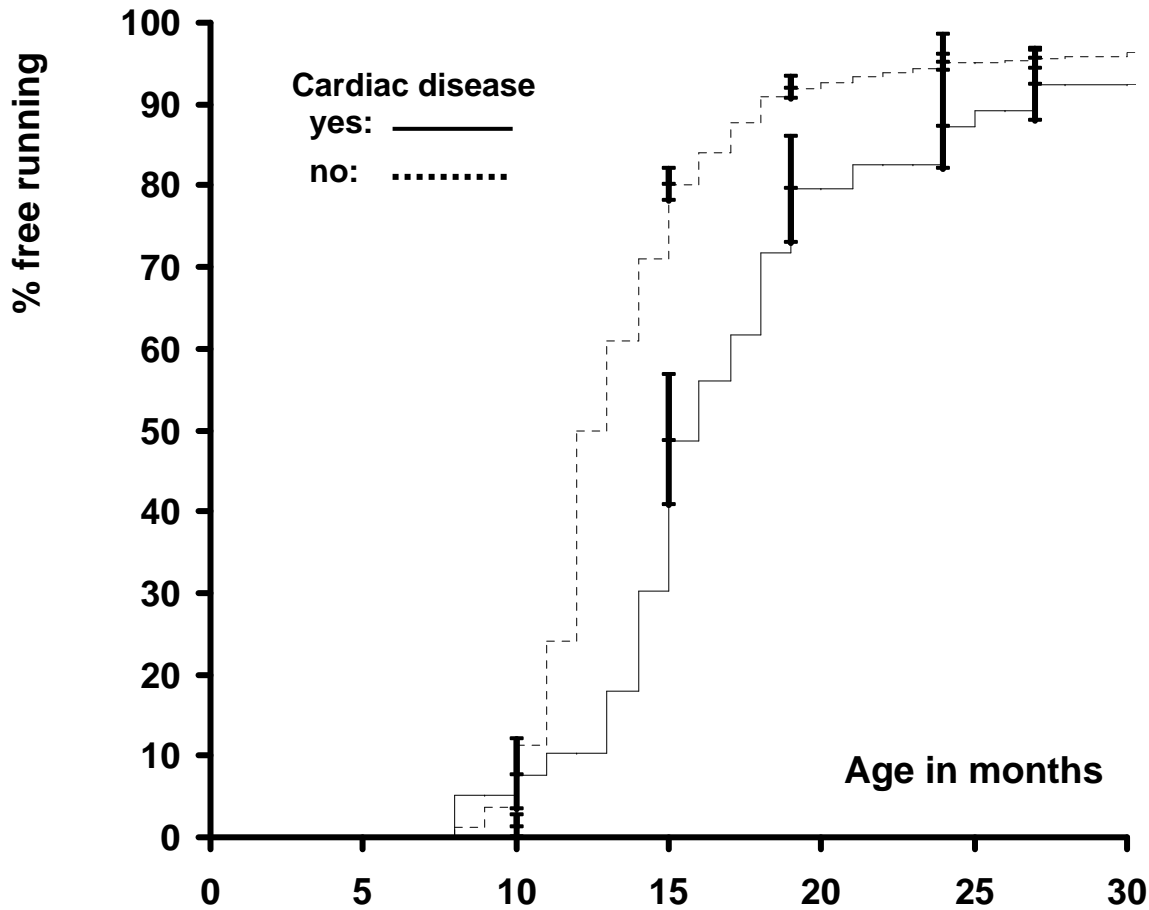

**Number at risk**

|                      |     |     |     |     |    |    |    |
|----------------------|-----|-----|-----|-----|----|----|----|
| No cardiac disease   | 398 | 397 | 382 | 111 | 32 | 20 | 16 |
| With cardiac disease | 39  | 39  | 36  | 26  | 8  | 4  | 3  |

Supplement: MOESM5 [file 9474842]
